# Supplementary material for: Endoplasmic reticulum stress causes insulin resistance by inhibiting delivery of newly synthesized insulin receptors to the cell surface
Source: PubMed Central journal article supplement — Mol Biol Cell. 2020 Nov 1;31(23):2597–629. doi: 10.1091/mbc.E18-01-0013 (PMC7851869; doi:10.1091/mbc.e18-01-0013), 2020-11-01
Supplement: mbc-31-2597-s001.pdf [file mbc-31-2597-s001.pdf]

# Supplemental Materials

*Molecular Biology of the Cell*

Brown *et al.*

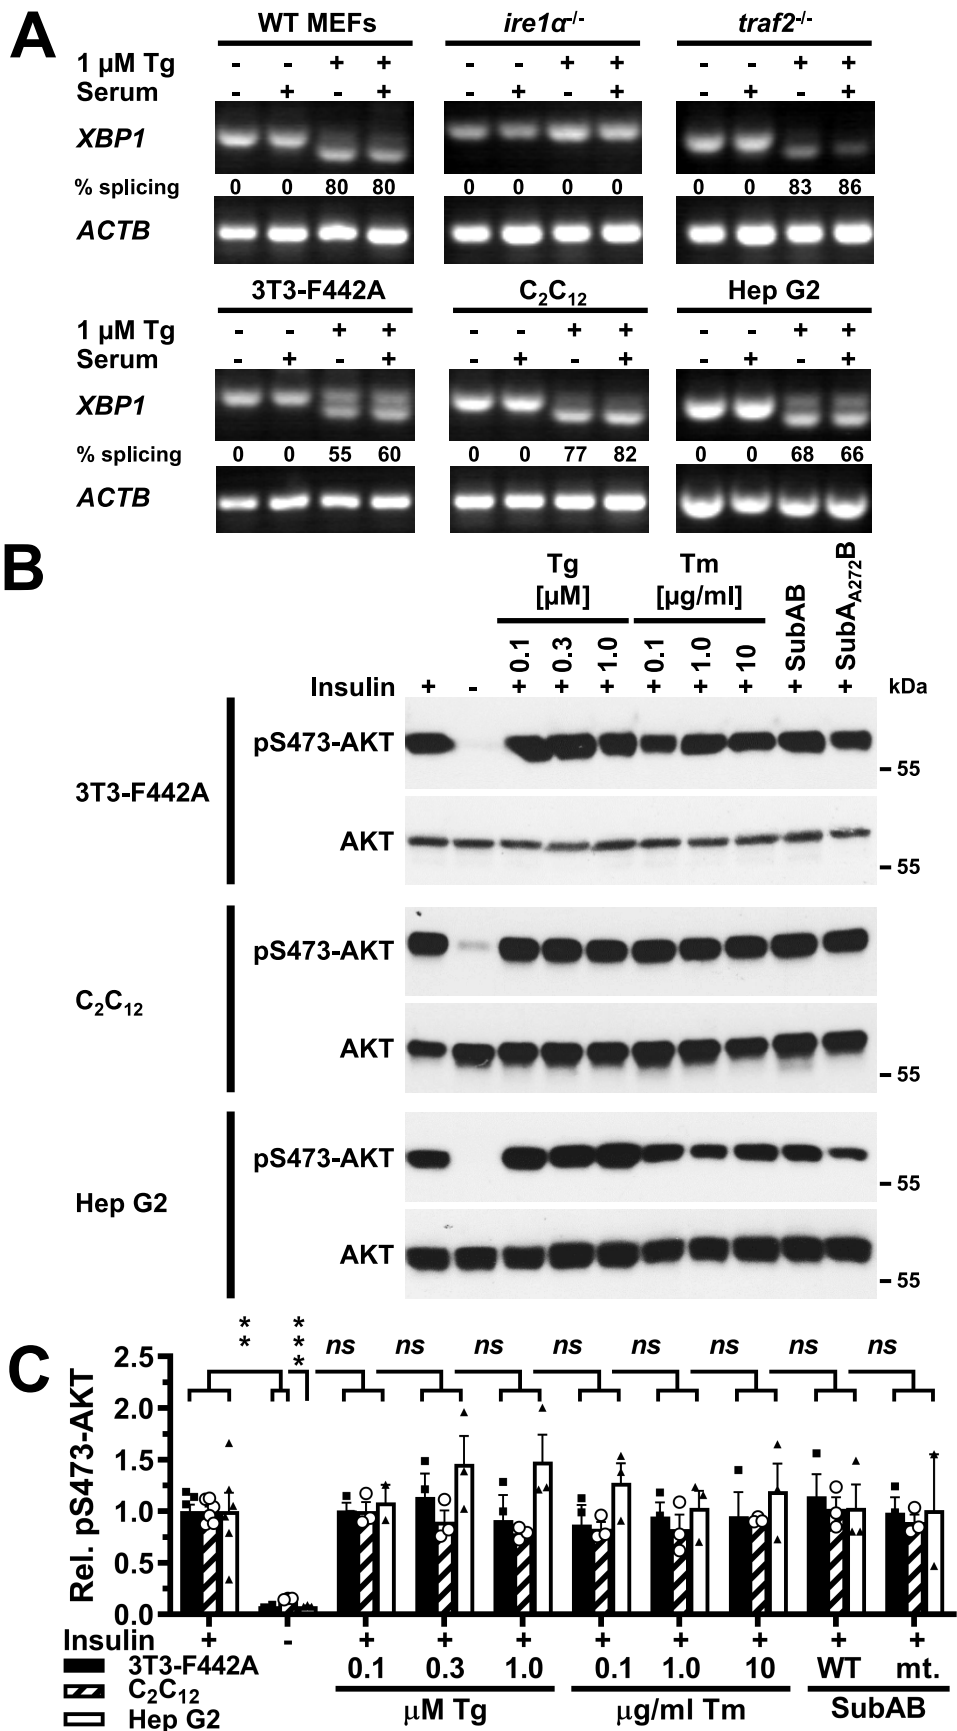

Figure S1

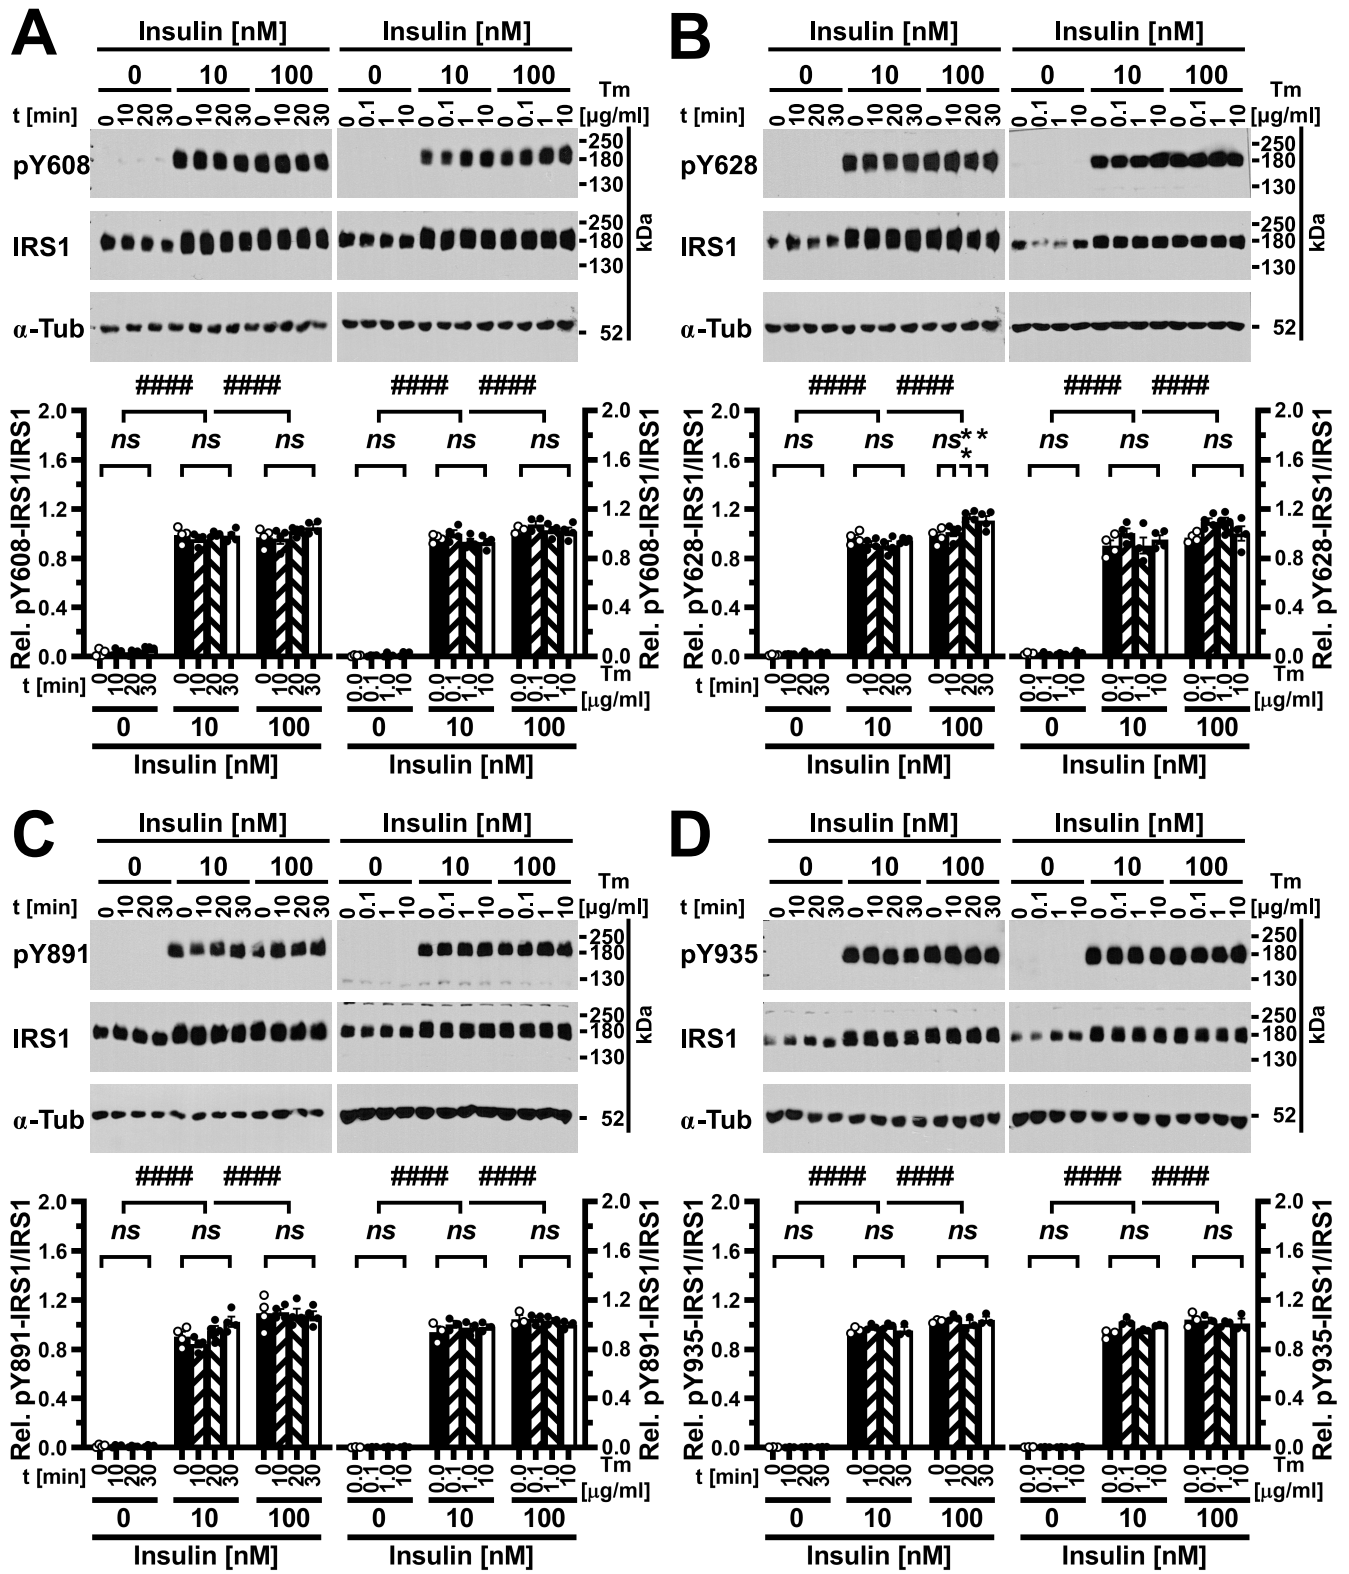

Figure S2





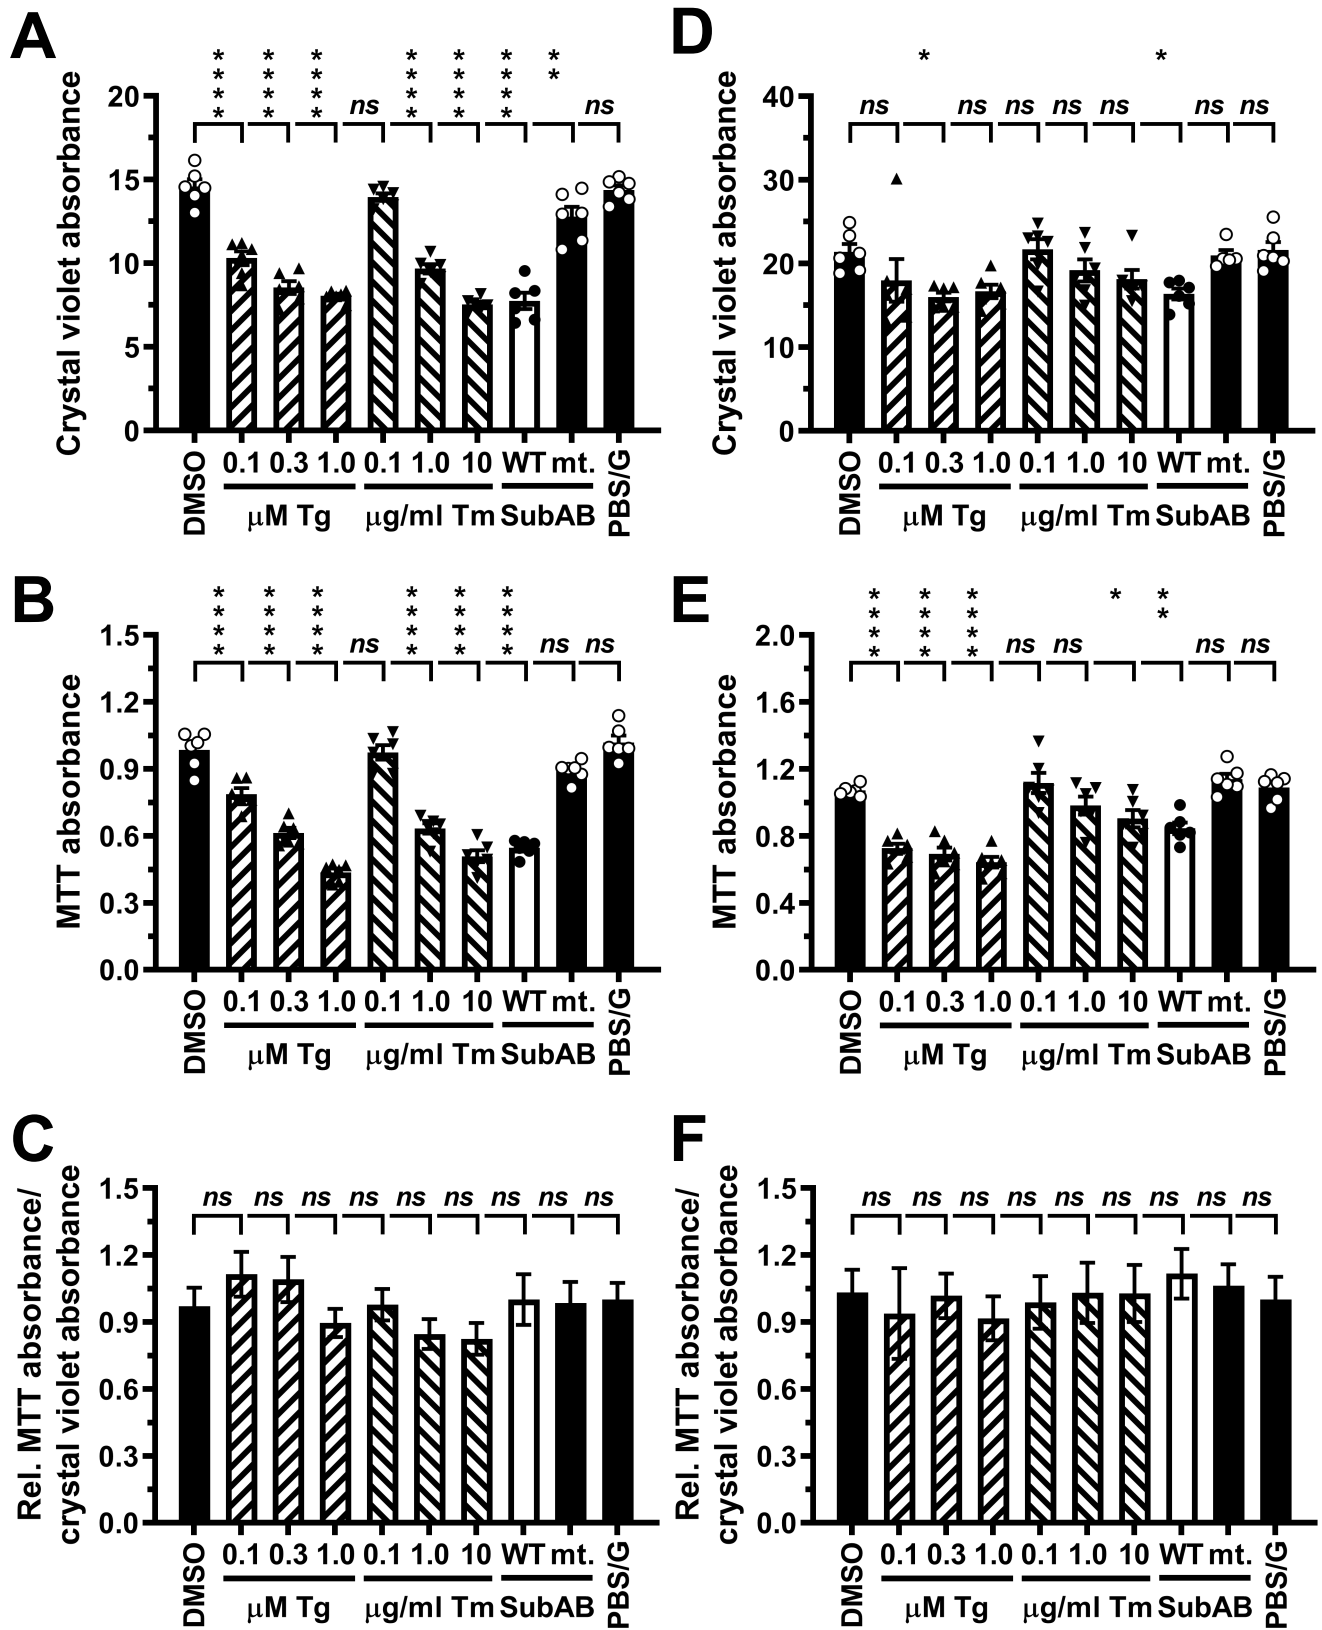

Figure S4

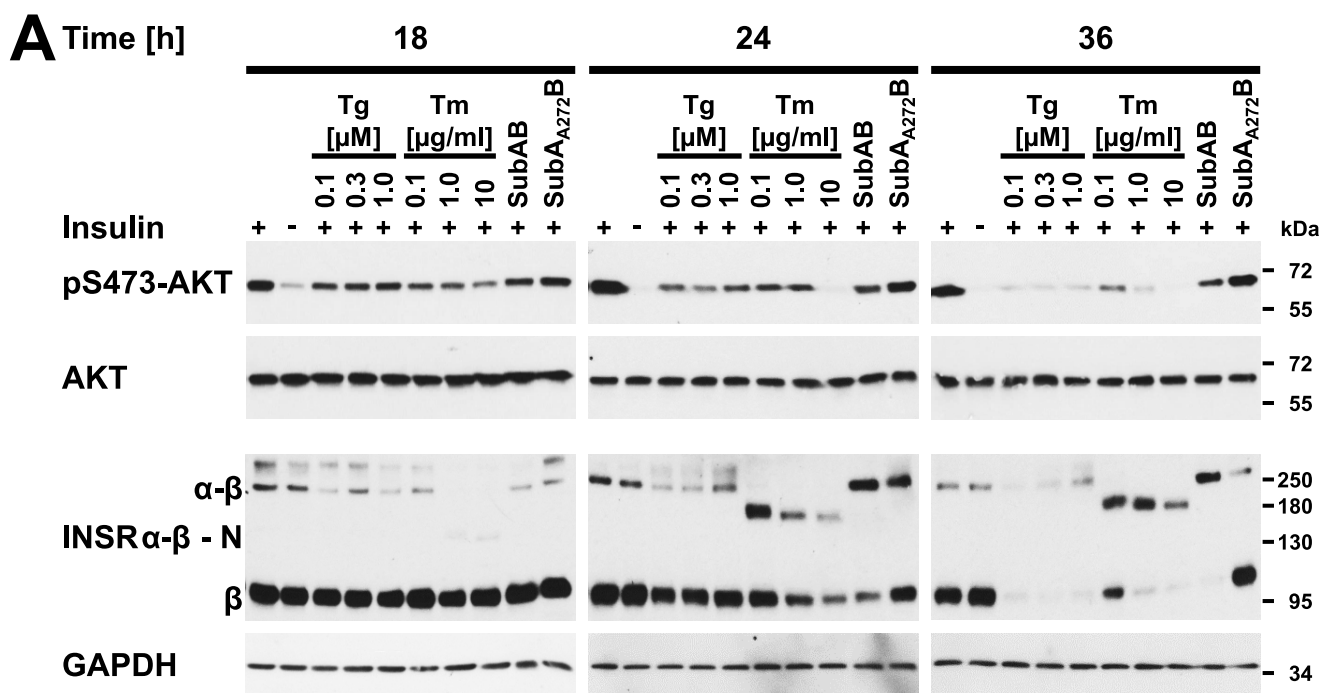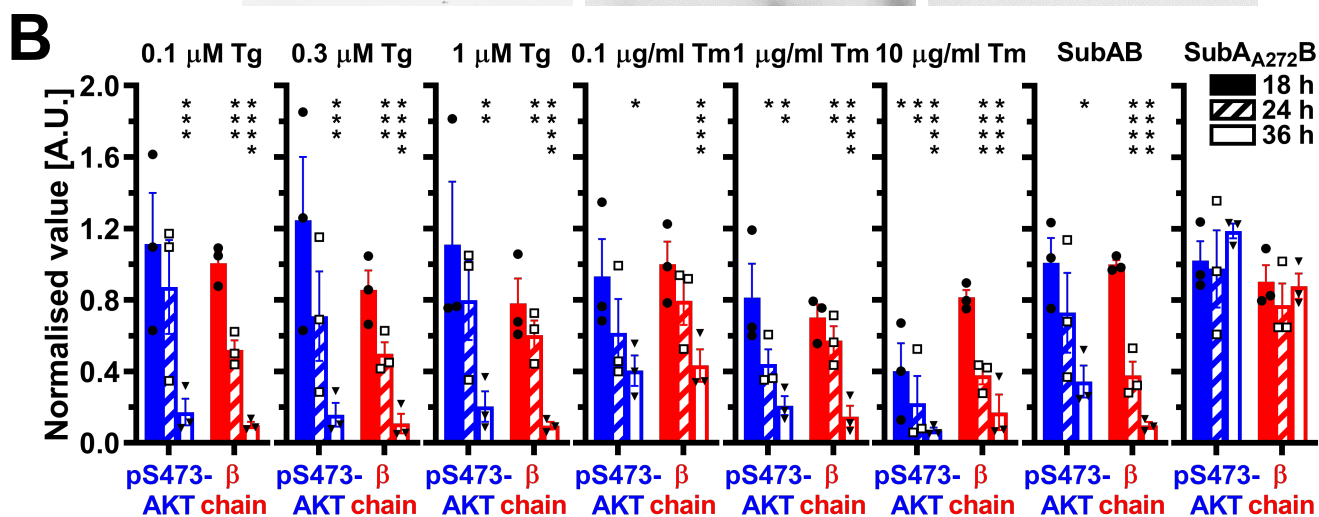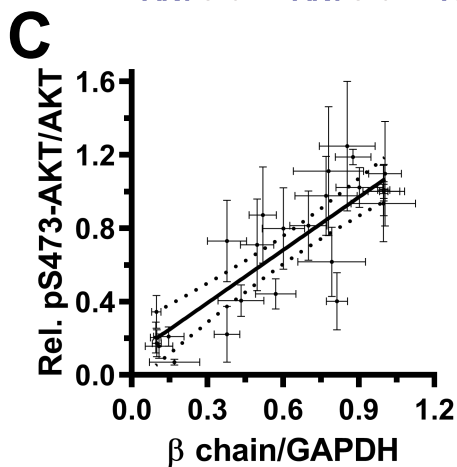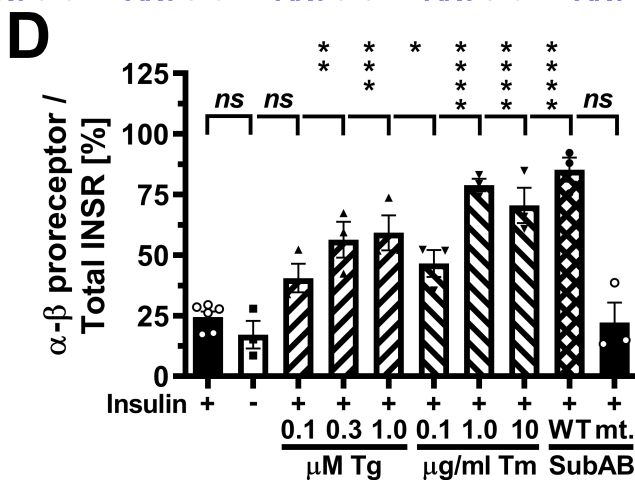

Figure S5

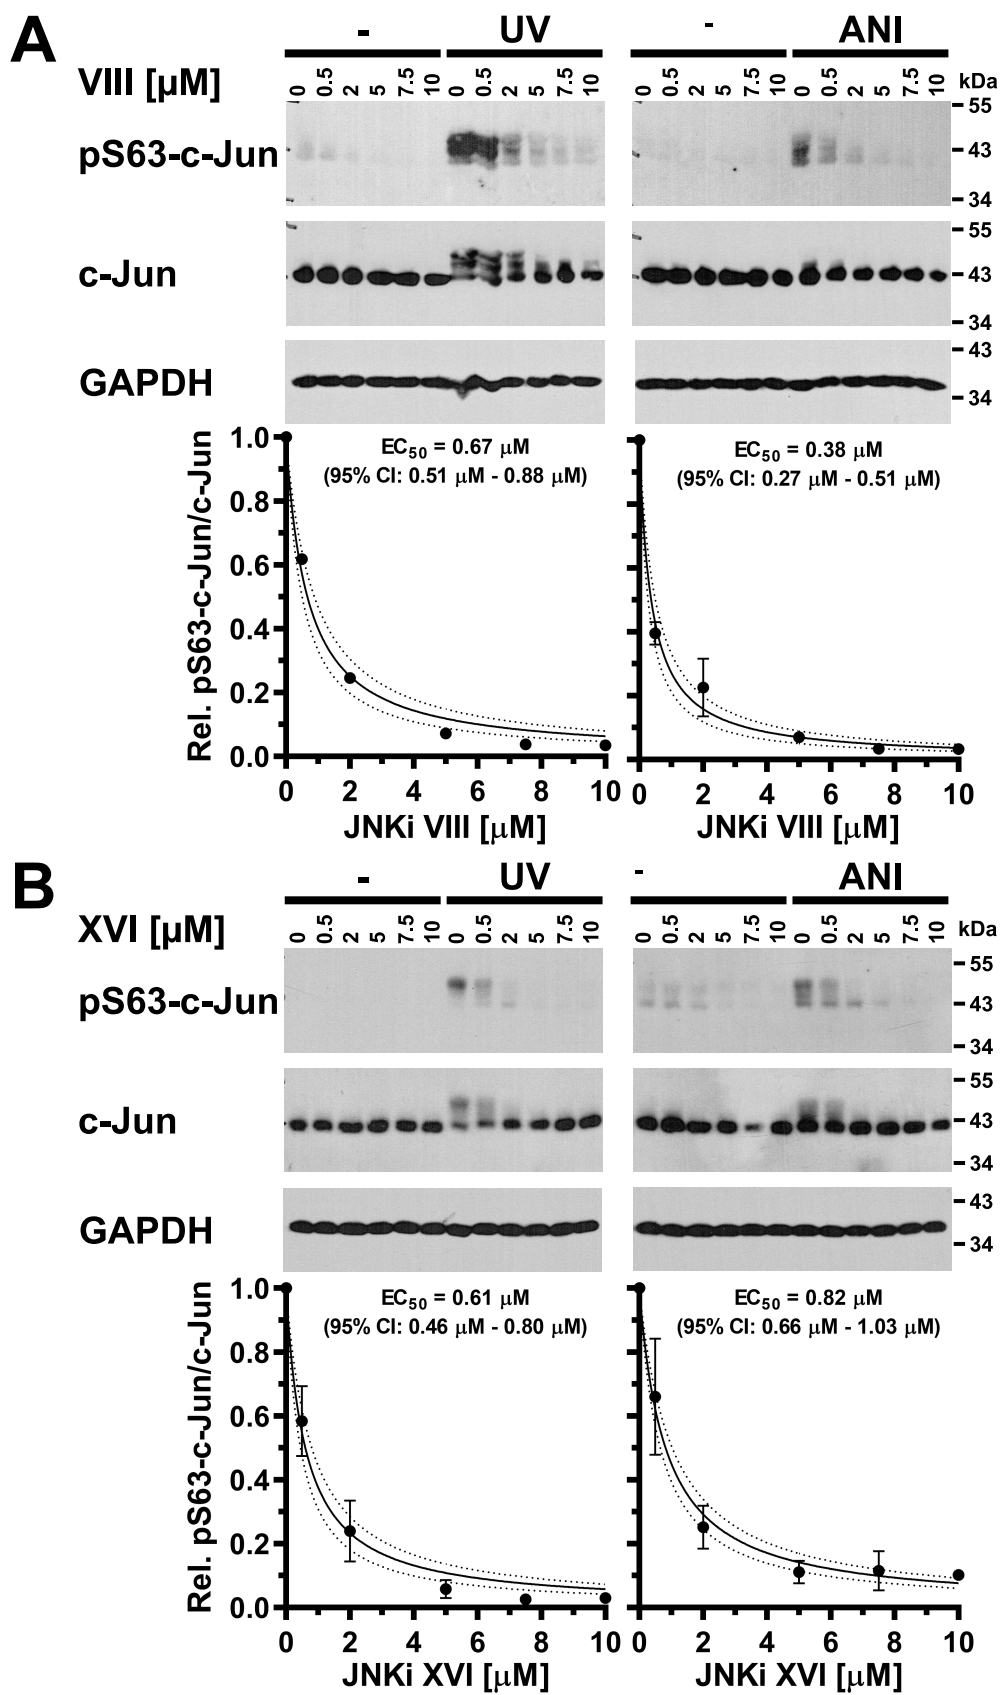

Figure S6

1 **Figure S1.** Acute ER stress does not inhibit insulin-dependent AKT activation. (A) Serum  
2 starvation does not affect activation of *XBPI* splicing in WT, *ire1 $\alpha$ <sup>-/-</sup>*, or *traf2<sup>-/-</sup>* MEFs, 3T3-  
3 F442A cells, C<sub>2</sub>C<sub>12</sub> cells, or Hep G2 cells. Cells were serum-starved for 18 h, where indicated,  
4 and then treated with 1  $\mu$ M thapsigargin for 1 h. (B) 3T3-F442A adipocytes, C<sub>2</sub>C<sub>12</sub> myotubes,  
5 and Hep G2 cells were serum-starved for 18 h and treated with the indicated concentrations of  
6 thapsigargin, tunicamycin, 1  $\mu$ g/ml SubAB or SubA<sub>A272</sub>B during the last 30 min of serum  
7 starvation and then stimulated with 100 nM insulin for 15 min, where indicated, in the continued  
8 presence of thapsigargin, tunicamycin, SubAB, or SubA<sub>A272</sub>B. Cell lysates were analysed by  
9 Western blotting. (C) Quantification of the phosphorylation of AKT on S473. Bars represent  
10 standard errors ( $n = 6$  for unstressed, insulin-stimulated cells and  $n = 3$  for all other samples).  
11  $p$  values for comparison of ER-stressed samples and samples not stimulated with 100 nM  
12 insulin to samples stimulated with 100 nM insulin were calculated by ordinary two-way  
13 ANOVA with Dunnett's multiple comparisons test.

14 **Figure S2.** Acute ER stress does not inhibit insulin-stimulated phosphorylation of IRS1 at four  
15 specific tyrosine phosphorylation sites in 3T3-F442A cells. Tyrosine phosphorylation at (A)  
16 Y608, (B) Y628, (C) Y891, and (D) Y935 was analysed by Western blotting. 3T3-F442A cells  
17 were serum-starved for 12 h before exposure to 1  $\mu$ M thapsigargin for 10, 20, or 30 min (left  
18 side of figure panels) or to 0.1, 1.0, or 10  $\mu$ g/ml tunicamycin for 30 min (right side of figure  
19 panels), followed by stimulation with the indicated concentrations of insulin for 5 min in the  
20 continued presence of thapsigargin or tunicamycin. Bars represent standard errors ( $n = 3$  for  
21 phosphorylation at Y935,  $n = 4$  for phosphorylation at Y608, Y628, and Y891).  $p$  values for  
22 comparison of effects of thapsigargin or tunicamycin within one insulin concentration and for  
23 comparison of effects of different insulin concentrations were calculated by ordinary two-way  
24 ANOVA with Tukey's multiple comparisons test. Data for effects of thapsigargin on Y628  
25 phosphorylation of IRS1 were square root-transformed before statistical analyses.

26 **Figure S3.** Acute ER stress does not inhibit insulin-stimulated phosphorylation of IRS1 at four  
27 specific tyrosine phosphorylation sites in Hep G2 cells. Tyrosine phosphorylation at (A) Y612,  
28 (B) Y632, (C) Y896, and (D) Y941 was analysed by Western blotting. Hep G2 cells were

29 serum-starved for 18 h before exposure to 1  $\mu$ M thapsigargin for 10, 20, or 30 min (left side of  
30 figure panels) or to 0.1, 1.0, or 10  $\mu$ g/ml tunicamycin for 30 min (right side of figure panels),  
31 followed by stimulation with the indicated concentrations of insulin for 5 min in the continued  
32 presence of thapsigargin or tunicamycin. Bars represent standard errors ( $n = 4$  for effects of  
33 thapsigargin on Y612 phosphorylation,  $n = 5$  for Y632 phosphorylation and effects of  
34 thapsigargin on Y896 and Y941 phosphorylation,  $n = 6$  for effects of tunicamycin on Y612 and  
35 Y896 phosphorylation, and  $n = 7$  for effects of tunicamycin on Y941 phosphorylation).  $p$  values  
36 for comparison of effects of thapsigargin or tunicamycin within one insulin concentration and  
37 for comparison of effects of different insulin concentrations were calculated by ordinary two-  
38 way ANOVA with Tukey's multiple comparisons test. Data for Y896 and Y941  
39 phosphorylation of IRS1 were square root-transformed before statistical analyses.

40 **Figure S4.** Prolonged ER stress does not affect viability of (A-C) C<sub>2</sub>C<sub>12</sub> and (D-F) Hep G2  
41 cells. C<sub>2</sub>C<sub>12</sub> and Hep G2 cells were exposed to the indicated ER stressors for 24 h or 36 h,  
42 respectively. (A, D) Residual cell staining with crystal violet. (B, E) Determination of cell  
43 viability by measurement of the activity of the mitochondrial redox chain with MTT. (C, F)  
44 Standardisation of mitochondrial activity measured by reduction of MTT to *N*-[4,5-  
45 dimethylthiazol-2-yl]-3, *N'*''-diphenylformazan to cell number determined by crystal violet  
46 staining. Bars represent standard errors ( $n = 6$ ).  $p$  values for comparison to the 0.1% (v/v)  
47 DMSO control (labelled 'DMSO') were calculated by ordinary one-way ANOVA with  
48 Dunnett's multiple comparisons test. Abbreviation: PBS/G – PBS + 50% (v/v) glycerol, added  
49 to a final concentration of 0.13% (v/v) to culture medium.

50 **Figure S5.** Depletion of insulin receptors correlates with decreased AKT S473 phosphorylation  
51 in ER-stressed Hep G2 cells. (A) Serum-starved Hep G2 cells were treated with the indicated  
52 concentrations of thapsigargin, tunicamycin, 1  $\mu$ g/ml SubAB or 1  $\mu$ g/ml SubA<sub>A272</sub>B for 18 - 36  
53 h before stimulation with 100 nM insulin for 15 min. Western blots for pS473-AKT, total AKT,  
54 the insulin receptor (INSR), and GAPDH. (B) Quantification of the phosphorylation of AKT  
55 on S473 ('pS473-AKT') and of the relative abundance of  $\beta$  chains of the insulin receptor (' $\beta$   
56 chains'). Bars represent standard errors ( $n = 6$  for cells stimulated with 100 nM insulin,  $n = 3$

57 for all other samples). Phosphorylation of AKT at S473 and the relative abundance of  $\beta$  chains  
 58 are expressed relative to unstressed cells that were stimulated with 100 nM insulin for 15 min.  
 59  $p$  values for comparison of ER-stressed to unstressed samples were calculated using ordinary  
 60 two-way ANOVA with Dunnett's multiple comparisons test. (C) Correlation of insulin-  
 61 stimulated AKT phosphorylation with insulin receptor  $\beta$  chains ( $r^2 = 0.74$ , two-tailed  $p < 0.0001$   
 62 for a significantly non-zero slope, and  $p > 0.05$  for deviation from linearity calculated by a runs  
 63 test,  $n = 27$ ). Dotted lines represent the 95% confidence interval of the linear regression line.  
 64 The relative phosphorylation of AKT at S473 shown in panel B was plotted against the relative  
 65 abundance of  $\beta$  chains shown in panel B. (D) Quantification of the relative abundance of  $\alpha$ - $\beta$   
 66 precursors of the insulin receptor in Hep G2 cells exposed to the indicated concentrations of  
 67 thapsigargin, tunicamycin, 1  $\mu\text{g/ml}$  SubAB, or SubA<sub>A272</sub>B for 36 h. Bars represent standard  
 68 errors ( $n = 6$  for unstressed, insulin-stimulated cells and  $n = 3$  for all other samples).  $p$  values  
 69 for comparison of ER-stressed samples and samples not stimulated with 100 nM insulin to the  
 70 sample stimulated with 100 nM insulin were calculated using ordinary one-way ANOVA with  
 71 Dunnett's multiple comparisons test.

72 **Figure S6.** JNKi VIII and XVI inhibit phosphorylation of c-Jun at S63 after activation of JNKs  
 73 in a dose-dependent manner. (A) Dose-response curves for JNKi VIII and (B) JNKi XVI. Hep  
 74 G2 cells were treated with the indicated concentrations of the JNK inhibitors for 30 min and  
 75 then stimulated with UV light ( $400 \text{ J/m}^2$ ,  $\lambda = 254 \text{ nm}$ ) or treated with 5  $\mu\text{g/ml}$  anisomycin (ANI)  
 76 for 30 min in the continued presence of the corresponding concentrations of JNKi VIII or XVI.  
 77 After UV exposure, cells were cultured in the presence of the corresponding concentrations of  
 78 JNKi VIII or XVI for 30 min. Cell lysates were analysed by Western blotting for pS63-c-Jun,  
 79 c-Jun, and GAPDH. Relative pS63-c-Jun phosphorylation data were fitted to the equation

$$81 \quad \text{Rel. pS63-c-Jun phosphorylation} = \frac{1}{1 + \frac{[\text{JNKi}]}{EC_{50}}}$$

80 in GraphPad Prism to calculate  $EC_{50}$  values and their 95% confidence intervals (CI).
